# Supplementary material for: Prevention of covid-19 and other acute respiratory infections with cod liver oil supplementation, a low dose vitamin D supplement: quadruple blinded, randomised placebo controlled trial
Source: PubMed Central journal article supplement — BMJ. 2022 Sep 7;378:e071245. doi: 10.1136/bmj-2022-071245 (PMC9449357; doi:10.1136/bmj-2022-071245), 2022-09-07
Supplement: brus071245.ww2.pdf [file brus071245.ww2.pdf]

## Supplement 2

### Supplemental Online Content

Brunvoll SH, Nygaard AB, Ellingjord-Dale M et al; Prevention of covid-19 and other acute respiratory infections with cod liver oil supplementation, a low-dose vitamin D supplement: quadruple blinded, randomised placebo controlled trial

**sTable 1** Analysed levels of vitamin A, D and E in cod liver oil and placebo (corn oil).

**sTable 2** Randomisation round, date, and the number of participants.

**sAppendix 1** The questions of the baseline and reporting questionnaires

**sAppendix 2** Certificate of Proficiency, DEQAS

**sTable 3** The QC batches, 25(OH)D

**sTable 4** Ad-hoc subgroup analyses; Relative risk and CI for the first and second co-primary endpoints (covid-19), according to randomised assignment to cod liver oil or placebo, in intention-to-treat analyses

**sTable 5** Ad-hoc subgroup analyses; Relative Risk and CI for the third and fourth co-primary endpoints (acute respiratory infections), according to randomised assignment to cod liver oil or placebo, in intention-to-treat analyses

**sTable 6.** Ad-hoc subgroup analyses; the third and fourth co-primary endpoints (acute respiratory infections), according to skin type and assignment to cod liver oil or placebo.

**sTable 7** Logistic regression with explanatory variables, positive SARS-CoV-2 test result

**sTable 8** Logistic regression with explanatory variables, serious covid-19

**sFigure 1** Positive SARS-CoV-2 test result over the intervention period

**sFigure 2** Serious covid-19 over the intervention period

The authors have provided this supplement to give readers additional information about the trial.

**sTable 1.** Analysed levels of the vitamin A, D and E in the cod liver oil and the placebo (corn oil).

|                            | <b>Vitamin A<sup>a</sup></b><br><b>(µg/ml)</b> | <b>Vitamin D<sup>b</sup></b><br><b>(µg/ml)</b> | <b>Vitamin E<sup>c</sup></b><br><b>(mg/ml)</b> |
|----------------------------|------------------------------------------------|------------------------------------------------|------------------------------------------------|
| Cod liver oil batches      |                                                |                                                |                                                |
| SN202484                   | 59                                             | 2,4                                            | 0,6                                            |
| SN202472                   | 57                                             | 2,3                                            | 0,6                                            |
| SN202462                   | 60                                             | 2,4                                            | 0,6                                            |
| SN202444                   | 61                                             | 2,4                                            | 0,6                                            |
| Placebo (corn oil) batches |                                                |                                                |                                                |
| SN202432                   | 3,9                                            | 0                                              | 0,732                                          |
| SN202422                   | 3,5                                            | 0                                              | 0,742                                          |
| SN202412                   | 3,3                                            | 0                                              | 0,771                                          |
| SN202402                   | 1,9                                            | 0                                              | 0,808                                          |

<sup>a</sup>The content of vitamin A (retinol OH) was determined in the unsaponifiable fraction by the use of HPLC and UV detection.

<sup>b</sup>The content of vitamin D (cholecalciferol) was determined by the use of HPLC and UV detection.

<sup>c</sup>The content of vitamin E was determined by the use of HPLC and UV detection.

**sTable 2.** Randomisation round, date, and the number of participants.

| Round | Date             | Randomisation              |
|-------|------------------|----------------------------|
|       |                  | Number (%) of participants |
| 1     | 19 November 2020 | 25 577 (73.6)              |
| 2     | 6 December 2020  | 5 396 (15.5)               |
| 3     | 23 February 2021 | 2 627 (7.6)                |
| 4     | 13 April 2021    | 1 141 (3.3)                |

**sAppendix 1**The questions of the baseline and reporting questionnaires

Translation of the enrolment questionnaire, baseline questionnaire and reporting questionnaires

*Translation of enrolment questionnaire*

**Check all the boxes which are relevant to you**

I have had, or have, one of the following conditions or diseases: kidney failure or dialysis, hypercalcemia (elevated levels of calcium), severe liver disease (cirrhosis), sarcoidosis or other granulomatous diseases (Wegener)

I am intolerant to fish oil or corn oil

I have trouble swallowing cod liver oil or other oils

I am pregnant or planning to become pregnant within the next year

None of the above

*Translation of relevant parts of the baseline questionnaires*

*General information about the participant*

**Sex**

Male

Female

Other

**Enter your age:**

(Open number field)

**What is your height in centimetres?**

(Open number field)

**What is your weight in kilos?**

(Open number field)

**Are you a smoker?**

Yes

No, I have never smoked

Yes, I was a smoker before

Yes, I vape

Don't know

**Check off any illnesses or conditions you have.**

**You can tick one option per condition.**

*Chronic heart disease including congenital heart disease (not high blood pressure)*

Yes

No

Don't know

*High blood pressure*

Yes

No

Don't know

*Chronic lung disease (other than asthma)*

Yes

No

Don't know

*Asthma*

Yes

No

Don't know

*Diabetes*

Yes

No

Don't know

On immunosuppressive treatment

Yes

No

Don't know

*Cancer (being treated)*

Yes

No

Don't know

**I would say my physical condition is:**

Poor

Average

Good

**What is the ethnical background of your parents?**

**Multiple answers are possible, if other please specify in the next question.**

Europe

Africa

Asia

Other

**If other ethnical background, please specify**

(Open text field)

*Sun exposure and vitamin D*

**What is your skin type?**

Will easily turn red and rarely if ever tanned. I have light, sensitive skin and sometimes freckles.

Will almost always turn red and sometimes tanned.

Will be red sometimes, but always tanned after a while.

Will never be red, always tanned.

Naturally black/tanned skin.

**How many hours have you spent in the sun during the months of July-October 2020?**

**The number of hours in the sun in total with the arms or other parts of the body uncovered by clothing.**

0 hours

1-10 hours

11-30 hours

31-50 hours

Over 50 hours

**Do you use cod liver oil?**

Yes, all year

Yes, but only in the winter

No

**How often do you take cod liver oil?**

Every day

5-6 days a week

3-4 days a week

1-2 days a week

Less than 1 day a week

**Do you take any supplements containing vitamin D?**

**Some examples are supplements containing only vitamin D, multi-vitamin supplements or a combined supplement with vitamin D and omega-3 fatty acids.**

**Cod liver oil is NOT to be included here.**

Yes, all year

Yes, only in the winter

No

**How often do you take supplements containing vitamin D?**

Every day

5-6 days a week

3-4 days a week

1-2 days a week

Less than 1 day a week

**How often do you eat fatty fish?**

**Fatty fish includes salmon, trout, halibut, mackerel, herring, and eel.**

Never/rarely

1-3 times per month

1-2 times per week

3-4 times per week

5 times or more per week

**How many slices of bread with fatty fish do you eat per week**

**Fatty fish includes salmon, trout, halibut, mackerel, herring, and eel.**

Less than 1

1-3 slices

4-7 slices

8-14 slices

15 slices or more

**How many live in your household?**

**Number of people, including yourself (the ones you share a bathroom and/or kitchen with).**

1 (I live alone)

2

3

4

5

6

More than 6

**How many children (below the age of 18 years old) live in your household?**

0

1

2

3

4

5

More than 5 children

**What is your highest completed level of education?**

Primary school (up to 10 years "grunnskole", 7 years "folkeskole" or similar)

High school or vocational training

College or university, less than 4 years

College or university, 4 years or more

Other

**What is your highest completed level of education?**

Open text field

**What is the estimated total income of your household, before taxes?**

Less than 300 000 NOK

300 000 - 600 000 NOK

600 000 – 1 000 000 NOK

More than 1 million NOK



**What is your current employment situation?**

**More than one answer is possible.**

Employed

Stay at home

Unemployed

Retired (due to age)

On sick leave/social security benefits

Student

Temporarily laid off

*Vaccination, covid-19 testing and respiratory tract infections*

**I have been tested for coronavirus in the throat and/or nose**

**Complete this question even if you have stated to have tested positive previously.**

Yes, and at least one test was positive, and I have/ have had coronavirus

Yes, but the test(s) is/are negative

Yes, and I am waiting for the results

No, I have not been tested.

**Are you, or have you been, hospitalised due to coronavirus?**

Yes

No

**How many days have you been admitted?**

(Open number field)

**Are/were you admitted to the intensive care ward?**

Yes

No

I don't know

*Translation of the reporting questionnaires*

*(The reporting questionnaire was distributed up to six times during the trial in slightly different versions.)*

*Vaccination, covid-19 testing and respiratory tract infections*

**I have been tested for coronavirus in the throat and/or nose**

**Complete this question even if you have stated to have tested positive previously.**

Yes, and at least one test was positive, and I have/ have had coronavirus

Yes, but the test(s) is/are negative

Yes, and I am waiting for the results

No, I have not been tested.

**Are you, or have you been, hospitalised due to coronavirus?**

Yes

No

**How many days have you been admitted?**

(Open number field)

**Are/were you admitted to the intensive care ward?**

Yes

No

I don't know

**Check off all the symptoms you had in the period you got tested (in the nose and/or throat) for coronavirus.**

**State how long each symptom lasted.**

**This can be before or after the sampling of the nose and/or throat. Check the boxes for the symptoms you had/did not have in the period you were tested for coronavirus**

*Fever*

I did not have this symptom

1-7 days

8-21 days

More than 21 days

I still have this symptom

*High fever (measure to be higher than 39 °C)*

I did not have this symptom

1-7 days

8-21 days

More than 21 days

I still have this symptom

*Heavy breathing (dyspnoea)*

I did not have this symptom

1-7 days

8-21 days

More than 21 days

I still have this symptom

*Cough*

I did not have this symptom

1-7 days

8-21 days

More than 21 days

I still have this symptom

*Fatigue*

I did not have this symptom

1-7 days

8-21 days

More than 21 days

I still have this symptom

*Muscle aches*

I did not have this symptom

1-7 days

8-21 days

More than 21 days

I still have this symptom

*Sore throat*

I did not have this symptom

1-7 days

8-21 days

More than 21 days

I still have this symptom

*Impaired sense of smell/taste*

I did not have this symptom

1-7 days

8-21 days

More than 21 days

I still have this symptom

*Stuffy or runny nose*

I did not have this symptom

1-7 days

8-21 days

More than 21 days

I still have this symptom

*Headache*

I did not have this symptom

1-7 days

8-21 days

More than 21 days

I still have this symptom

*Stomach pain/nausea/diarrhoea*

I did not have this symptom

1-7 days

8-21 days

More than 21 days

I still have this symptom

*Memory issues*

I did not have this symptom

1-7 days

8-21 days

More than 21 days

I still have this symptom

*Issues concentrating or thinking*

I did not have this symptom

1-7 days

8-21 days

More than 21 days

I still have this symptom

*Other symptoms*

I did not have this symptom

1-7 days

8-21 days

More than 21 days

I still have this symptom

*No symptoms*

I did not have this symptom

1-7 days

8-21 days

More than 21 days

I still have this symptom

**Expand on what other symptoms you experienced when you had covid-19:**

(Open text field)

**Have you been vaccinated against covid-19?**

Yes

No

**If you answered yes, how many times have you received the covid-19 vaccine?**

1

2

3, or more

**Estimate the date of your last dose of vaccine**

(Date field, DD.MM.YYYY)

**How many times have you had light infections in the last 6 months?**

**For instance, a cold, the flu and urinary tract infections without hospitalisation. Covid-19 is NOT to be included here.**

0

1-2

3-4

5-6

More than 6 times

**How many of these were upper respiratory tract infections?**

**For instance, a cold, cough or sore throat without hospitalisation.**

0

1-2

3-4

5-6

More than 6 times

**How many times have someone in your household had an upper respiratory tract infection in the past 6 months?**

**For instance, a cold, cough or sore throat without hospitalisation. The total number of the household, including yourself.**

0

1-5

6-10

11-15

More than 15 times

*Compliance with the trial*

**Use of cod liver oil or placebo**

**Approximately how long have you taken cod liver oil/placebo?**

**Give an estimate. If you have had pauses, sum up the total time you have been taking the oil.**

0-1 Months

2-3 Months

4-5 Months

6 Months

I have not taken the oil

I took the oil in a period, but have now quit

**Which date did you start taking the cod liver oil/placebo?**

Date field

**During the past two weeks, how many days have you taken cod liver oil/placebo?**

**Think of the past two weeks. If you have doubled the dose the day after you have forgotten a dose then count the dose as taken.**

Every day

Forgotten 1 day

Forgotten 2 days

Forgotten 3 days

Forgotten 4-5 days

Forgotten 6-7 days

Forgotten 8-9 days

Forgotten 10 days or more

**Which date did you stop taking the cod liver oil/placebo?**

Date field

**During the period you did take cod liver oil or placebo. How often did you take it?**

Every day

5-6 days per week

3-4 days per week

1-2 days per week

I did not take it

**Have you remembered to take cod liver oil or placebo on the weekends?**

Yes, both Saturday and Sunday

Yes, but I forget sometimes

Yes, usually at least one day

No, usually I forget during the weekends

**Do you take cod liver oil/placebo at the same time every day?**

Yes, every day

Yes, mostly

No

**How many bottles of cod liver oil/placebo have you received in total?**

1

2

3

4

5

6



**How much was left in your bottles at the end of the trial?**

**Sum up the volume left in all bottles that you have not taken.**

1 deciliter (dl)

2-3 dl

4-5 dl

6-7 dl

8-9 dl

10-12 dl

13-15 dl

16 dl or more

**If you have to guess, what do you think you received in the trial?**

Cod liver oil

Placebo

I don't know

*Side effects of the use of cod liver oil or placebo*

**Have you experienced side-effects when using the cod liver oil/placebo in the trial?**

Yes

No

I have not yet begun taking cod liver oil/placebo

**What sort of side-effects do you experience/did you experience?**

**Preferably use keywords**

Open text field

2020 - 2021

# Certificate of Proficiency

This is to certify that

*Dr Thomas Gundersen  
Vitas AS  
Oslo Innovation Center  
Gaustadalleen 21  
Oslo N-0349*

has participated in the international  
25 Hydroxyvitamin D EQAS  
and has met the performance target\*  
set by the DEQAS Advisory Panel

\* 75% or more results fell within  $\pm 25\%$  of the Target Value

**Advisory Panel**

Glennville Jones • Etienne Cavalier  
Ramon Durazo-Arvizu • Annemieke Heijboer  
Karen Phinney • Christopher Sempos • Patrick Twomey

*EC Walker*

Dr Emma Walker FRCPath  
DEQAS Organiser

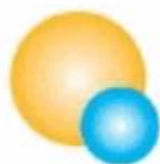

VITAMIN D EXTERNAL QUALITY ASSESSMENT SCHEME

DEQAS

**sTable 3.** QC batches, 25(OH)D analyses of dried blood spots.

| QC batch <sup>a</sup> | Type | Mean nmol/l | CV % |
|-----------------------|------|-------------|------|
| QC146                 | DBS  | 85.8        | 11.0 |
| QC172                 | DBS  | 282.6       | 10.3 |
| QC181                 | DBS  | 106.6       | 14.2 |

<sup>a</sup>Six QC samples for each sequence, three QC before and three QC after each sequence (96-well plates). In addition, the three QC before were reinjected in the middle of the sequence.

**sTable 4.** Ad-hoc subgroup analyses; Relative risk and CI<sup>a</sup> for the first and second co-primary endpoints (covid-19), according to randomised assignment to cod liver oil or placebo.

| <b>Co-primary endpoint, covid-19</b>         | <b>Overall<br/>(n = 34 601)</b> | <b>Cod liver oil<br/>group<br/>(n = 17 278)</b> | <b>Placebo<br/>group<br/>(n = 17 323)</b> | <b>Relative Risk<br/>(CI<sup>a</sup>)</b> | <b>p<sup>b</sup></b> |
|----------------------------------------------|---------------------------------|-------------------------------------------------|-------------------------------------------|-------------------------------------------|----------------------|
| <i>number (%) of participants with event</i> |                                 |                                                 |                                           |                                           |                      |
| First: SARS-CoV-2 positive test result       |                                 |                                                 |                                           |                                           |                      |
| Sex                                          |                                 |                                                 |                                           |                                           | 0.98                 |
| Women                                        | 292 (1.31)                      | 150 (1.34)                                      | 142 (1.27)                                | 1.06 (0.82, 1.36)                         |                      |
| Men                                          | 163 (1.33)                      | 77 (1.26)                                       | 86 (1.40)                                 | 0.90 (0.64, 1.26)                         |                      |
| Age <sup>c, d</sup>                          |                                 |                                                 |                                           |                                           | <0.001*              |
| <45 years                                    | 266 (1.59)                      | 135 (1.62)                                      | 131 (1.56)                                | 1.04 (0.80, 1.35)                         |                      |
| ≥45 years                                    | 189 (1.06)                      | 92 (1.03)                                       | 97 (1.09)                                 | 0.95 (0.69, 1.29)                         |                      |
| Body mass index <sup>d</sup>                 |                                 |                                                 |                                           |                                           | 1.00                 |
| ≤25 kg/m <sup>2</sup>                        | 224 (1.32)                      | 111 (1.30)                                      | 113 (1.34)                                | 0.97 (0.73, 1.30)                         |                      |
| >25 kg/m <sup>2</sup>                        | 231 (1.31)                      | 116 (1.33)                                      | 115 (1.30)                                | 1.02 (0.77, 1.36)                         |                      |
| Sun exposure Jul–Oct 20 <sup>d</sup>         |                                 |                                                 |                                           |                                           | 0.97                 |
| ≤30 hours                                    | 184 (1.33)                      | 100 (1.44)                                      | 84 (1.23)                                 | 1.17 (0.85, 1.62)                         |                      |
| >30 hours                                    | 271 (1.30)                      | 127 (1.23)                                      | 144 (1.38)                                | 0.89 (0.69, 1.16)                         |                      |
| Vitamin D supplement use <sup>e</sup>        |                                 |                                                 |                                           |                                           | 0.97                 |
| No                                           | 351 (1.31)                      | 181 (1.34)                                      | 170 (1.27)                                | 1.06 (0.84, 1.33)                         |                      |
| Yes                                          | 104 (1.34)                      | 46 (1.21)                                       | 58 (1.48)                                 | 0.82 (0.53, 1.25)                         |                      |
| Fatty fish consumer <sup>f</sup>             |                                 |                                                 |                                           |                                           | 0.51                 |
| No                                           | 180 (1.42)                      | 96 (1.50)                                       | 84 (1.33)                                 | 1.13 (0.82, 1.57)                         |                      |
| Yes                                          | 270 (1.27)                      | 130 (1.23)                                      | 140 (1.31)                                | 0.94 (0.72, 1.22)                         |                      |
| Vaccinated study period <sup>c,g</sup>       |                                 |                                                 |                                           |                                           | <0.001**             |
| No                                           | 362 (1.63)                      | 178 (1.61)                                      | 184 (1.64)                                | 0.98 (0.78, 1.23)                         |                      |
| Yes                                          | 93 (0.75)                       | 49 (0.79)                                       | 44 (0.72)                                 | 1.09 (0.70, 1.71)                         |                      |
| Strict compliance <sup>h</sup>               |                                 |                                                 |                                           |                                           | 0.30                 |
| No                                           | 164 (1.45)                      | 72 (1.35)                                       | 92 (1.55)                                 | 0.87 (0.62, 1.22)                         |                      |
| Yes                                          | 291 (1.25)                      | 155 (1.30)                                      | 136 (1.20)                                | 1.09 (0.84, 1.40)                         |                      |
| Second: Serious covid-19 <sup>i</sup>        |                                 |                                                 |                                           |                                           |                      |
| Sex                                          |                                 |                                                 |                                           |                                           | 0.26                 |
| Women                                        | 150 (0.67)                      | 90 (0.81)                                       | 60 (0.54)                                 | 1.50 (1.01, 2.23)                         |                      |
| Men                                          | 72 (0.59)                       | 31 (0.51)                                       | 41 (0.67)                                 | 0.76 (0.43, 1.33)                         |                      |
| Age <sup>j,k</sup>                           |                                 |                                                 |                                           |                                           | 0.04                 |
| <45 years                                    | 123 (0.73)                      | 71 (0.85)                                       | 52 (0.62)                                 | 1.38 (0.90, 2.12)                         |                      |
| ≥45 years                                    | 99 (0.55)                       | 50 (0.56)                                       | 49 (0.55)                                 | 1.02 (0.63, 1.63)                         |                      |
| Body mass index <sup>j,k</sup>               |                                 |                                                 |                                           |                                           | 0.07                 |
| ≤25 kg/m <sup>2</sup>                        | 95 (0.56)                       | 57 (0.67)                                       | 38 (0.45)                                 | 1.49 (0.91, 2.44)                         |                      |
| >25 kg/m <sup>2</sup>                        | 127 (0.72)                      | 64 (0.73)                                       | 63 (0.71)                                 | 1.03 (0.68, 1.56)                         |                      |
| Sun exposure Jul–Oct 20 <sup>k</sup>         |                                 |                                                 |                                           |                                           | 0.27                 |
| ≤30 hours                                    | 95 (0.69)                       | 54 (0.78)                                       | 41 (0.60)                                 | 1.30 (0.80, 2.12)                         |                      |
| >30 hours                                    | 127 (0.61)                      | 67 (0.65)                                       | 60 (0.57)                                 | 1.13 (0.74, 1.72)                         |                      |
| Vitamin D supplement use <sup>e</sup>        |                                 |                                                 |                                           |                                           | 0.19                 |
| No                                           | 165 (0.61)                      | 91 (0.68)                                       | 74 (0.55)                                 | 1.22 (0.85, 1.77)                         |                      |
| Yes                                          | 57 (0.74)                       | 30 (0.79)                                       | 27 (0.69)                                 | 1.14 (0.61, 2.14)                         |                      |

**sTable 4.** Ad-hoc subgroup analyses; Relative risk and CI<sup>a</sup> for the first and second co-primary endpoints (covid-19), according to randomised assignment to cod liver oil or placebo.

| <b>Co-primary endpoint, covid-19 continued</b> | <b>Overall (n = 34 601)</b>                  | <b>Cod liver oil group (n = 17 278)</b> | <b>Placebo group (n = 17 323)</b> | <b>Relative Risk (CI)<sup>a</sup></b> | <b>p<sup>b</sup></b> |
|------------------------------------------------|----------------------------------------------|-----------------------------------------|-----------------------------------|---------------------------------------|----------------------|
|                                                | <i>number (%) of participants with event</i> |                                         |                                   |                                       |                      |
| Second: Serious covid-19 <sup>h</sup>          |                                              |                                         |                                   |                                       |                      |
| Fatty fish consumer <sup>f,j</sup>             |                                              |                                         |                                   |                                       | 0.04                 |
| No                                             | 98 (0.77)                                    | 58 (0.91)                               | 40 (0.63)                         | 1.44 (0.89, 2.34)                     |                      |
| Yes                                            | 123 (0.58)                                   | 63 (0.59)                               | 60 (0.56)                         | 1.06 (0.69, 1.62)                     |                      |
| Vaccinated study period <sup>g,j</sup>         |                                              |                                         |                                   |                                       | <0.001 <sup>†</sup>  |
| No                                             | 179 (0.80)                                   | 93 (0.84)                               | 86 (0.77)                         | 1.10 (0.77, 1.56)                     |                      |
| Yes                                            | 43 (0.35)                                    | 28 (0.45)                               | 15 (0.25)                         | 1.83 (0.86, 3.89)                     |                      |
| Strict compliance (yes) <sup>h</sup>           | 154 (0.66)                                   | 79 (0.66)                               | 75 (0.66)                         | 1.00 (0.69, 1.47)                     | 0.55                 |

Data were missing for 1.7–5.4% of the participants.

<sup>a</sup>First co-primary and second co-primary endpoints (covid-19) 97.0% and 98.2% confidence interval (CI), respectively

<sup>b</sup>The logistic procedure test of the global hypothesis Wald test, significance criterion  $\alpha=0.03$  and 0.018 for the first and second co-primary endpoints, respectively.

<sup>c</sup>Further details are found in sTable 7 and sFigure 1

<sup>d</sup>These results are supported using logistic regression with Age, Body mass index and Sun exposure observed individual values. Treatment type 3 effect p-value are all >0.91 and explanatory effect type 3 p-values are <0.001, 0.40, and 0.53, respectively.

<sup>e</sup>Taking vitamin D supplements (including cod liver oil)  $\geq 5$  days/week was an exclusion criterion, but those with a lower frequency of usage were included.

<sup>f</sup>Consuming fatty fish  $\geq 1-2$  days/week and/or  $\geq 1-3$  slices of bread with fatty fish/week.

<sup>g</sup>Reported having  $\geq 1$  SARS-CoV-2 vaccines during the intervention period.

<sup>h</sup>Strict compliance (n=11 959 cod liver oil group, n=11 412 placebo group): reported cod liver oil/placebo consumed >0.5 L or consuming cod liver oil/placebo >2-3 months

<sup>i</sup>SARS-CoV-2 positive test and self-reported dyspnoea (n=222) and/or hospitalisation (n=17, 8 in the cod liver oil group and 9 in the placebo group) or death (n=0).

<sup>j</sup>Further details are found in sTable 8 and sFigure 2.

<sup>k</sup>These results are supported using logistic regression with Age, Body mass index and Sun exposure observed individual values. Treatment type 3 effect p-value are 0.17, 0.16, and 0.16 and explanatory effect type 3 p-values are <0.001, 0.06, and 0.30, respectively.

<sup>\*</sup>The type 3 analysis of effects resulted in p-value for the Age factor (<45 years versus  $\geq 45$  years) of <0.001, p-value for the treatment (cod liver oil/placebo) 0.99.

<sup>\*\*</sup>The type 3 analysis of effects resulted in p-value for the Vaccinated study period factor (No versus Yes) of <0.001, p-value for the treatment (cod liver oil/placebo) 0.97.

<sup>†</sup>The type 3 analysis of effects resulted in p-value for the Vaccinated study period factor (No versus Yes) of <0.001, p-value for the treatment (cod liver oil/placebo) 0.16.

**sTable 5.** Ad-hoc subgroup analyses; Relative Risk and 99.9% CI for the third and fourth co-primary endpoints (acute respiratory infections), according to randomised assignment to cod liver oil or placebo.

| <b>Co-primary endpoint, acute respiratory infections</b> | <b>Overall<br/>(n = 34 601)</b>              | <b>Cod liver oil<br/>group<br/>(n = 17 278)</b> | <b>Placebo<br/>group<br/>(n = 17 323)</b> | <b>Relative Risk<br/>(99.9% CI)</b> | <b>p<sup>a</sup></b> |
|----------------------------------------------------------|----------------------------------------------|-------------------------------------------------|-------------------------------------------|-------------------------------------|----------------------|
|                                                          | <i>number (%) of participants with event</i> |                                                 |                                           |                                     |                      |
| <b>Third: SARS-CoV-2 negative test result</b>            |                                              |                                                 |                                           |                                     |                      |
| Sex                                                      |                                              |                                                 |                                           |                                     | <0.001*              |
| Women                                                    | 11 564 (51.75)                               | 5 769 (51.69)                                   | 5 795 (51.81)                             | 1.00 (0.96, 1.04)                   |                      |
| Men                                                      | 5 547 (45.27)                                | 2 777 (45.40)                                   | 2 770 (45.14)                             | 1.01 (0.94, 1.07)                   |                      |
| Age <sup>b</sup>                                         |                                              |                                                 |                                           |                                     | <0.001**             |
| <45 years                                                | 9 938 (59.32)                                | 4 960 (59.47)                                   | 4 978 (59.18)                             | 1.01 (0.96, 1.05)                   |                      |
| ≥45 years                                                | 7 173 (40.19)                                | 3 586 (40.12)                                   | 3 587 (40.25)                             | 1.00 (0.94, 1.06)                   |                      |
| Body mass index <sup>b</sup>                             |                                              |                                                 |                                           |                                     | <0.001†              |
| ≤25 kg/m <sup>2</sup>                                    | 8 742 (51.46)                                | 4 414 (51.76)                                   | 4 328 (51.16)                             | 1.01 (0.96, 1.06)                   |                      |
| >25 kg/m <sup>2</sup>                                    | 8 369 (47.51)                                | 4 132 (47.22)                                   | 4 237 (47.81)                             | 0.99 (0.94, 1.04)                   |                      |
| Sun exposure Jul–Oct 20 <sup>b</sup>                     |                                              |                                                 |                                           |                                     | 0.19                 |
| ≤30 hours                                                | 6 743 (48.85)                                | 3 403 (48.98)                                   | 3 340 (48.72)                             | 1.01 (0.95, 1.06)                   |                      |
| >30 hours                                                | 10 368 (49.85)                               | 5 143 (49.79)                                   | 5 225 (49.91)                             | 1.00 (0.95, 1.04)                   |                      |
| Vitamin D supplement use <sup>c</sup>                    |                                              |                                                 |                                           |                                     | 0.17                 |
| No                                                       | 13 214 (49.18)                               | 6 603 (49.03)                                   | 6 611 (49.33)                             | 0.99 (0.95, 1.04)                   |                      |
| Yes                                                      | 3 897 (50.39)                                | 1 943 (50.97)                                   | 1 954 (49.82)                             | 1.02 (0.95, 1.10)                   |                      |
| Fatty fish consumer <sup>d</sup>                         |                                              |                                                 |                                           |                                     | <0.001††             |
| No                                                       | 6 547 (51.49)                                | 3 298 (51.68)                                   | 3 249 (51.30)                             | 1.01 (0.95, 1.07)                   |                      |
| Yes                                                      | 10 259 (48.20)                               | 5 103 (48.14)                                   | 5 156 (48.26)                             | 1.00 (0.95, 1.05)                   |                      |
| Vaccinated study period <sup>e</sup>                     |                                              |                                                 |                                           |                                     | <0.001†              |
| No                                                       | 11 561 (51.91)                               | 5 703 (51.63)                                   | 5 858 (52.18)                             | 0.99 (0.95, 1.03)                   |                      |
| Yes                                                      | 5 550 (45.01)                                | 2 843 (45.61)                                   | 2 707 (44.40)                             | 1.03 (0.96, 1.10)                   |                      |
| Strict compliance <sup>f</sup>                           |                                              |                                                 |                                           |                                     | <0.001#              |
| No                                                       | 5 995 (53.07)                                | 2 828 (52.85)                                   | 3 167 (53.27)                             | 0.99 (0.94, 1.05)                   |                      |
| Yes                                                      | 11 116 (47.70)                               | 5 718 (47.94)                                   | 5 398 (47.44)                             | 1.01 (0.97, 1.06)                   |                      |
| <b>Fourth: Acute respiratory infections</b>              |                                              |                                                 |                                           |                                     |                      |
| Sex                                                      |                                              |                                                 |                                           |                                     | <0.001‡              |
| Women                                                    | 5 269 (23.58)                                | 2 677 (23.99)                                   | 2 592 (23.17)                             | 1.04 (0.96, 1.12)                   |                      |
| Men                                                      | 2 529 (20.64)                                | 1 287 (21.04)                                   | 1 242 (20.24)                             | 1.04 (0.93, 1.17)                   |                      |
| Age <sup>g</sup>                                         |                                              |                                                 |                                           |                                     | <0.001‡‡             |
| <45 years                                                | 4 409 (26.32)                                | 2 253 (27.01)                                   | 2 156 (25.63)                             | 1.05 (0.97, 1.15)                   |                      |
| ≥45 years                                                | 3 389 (18.99)                                | 1 711 (19.14)                                   | 1 678 (18.83)                             | 1.02 (0.92, 1.13)                   |                      |
| Body mass index <sup>g</sup>                             |                                              |                                                 |                                           |                                     | 0.06                 |
| ≤25 kg/m <sup>2</sup>                                    | 3770 (22.19)                                 | 1954 (22.92)                                    | 1816 (21.47)                              | 1.07 (0.97, 1.17)                   |                      |
| >25 kg/m <sup>2</sup>                                    | 4028 (22.87)                                 | 2010 (22.97)                                    | 2018 (22.77)                              | 1.01 (0.92, 1.11)                   |                      |
| Sun exposure Jul–Oct 20 <sup>g</sup>                     |                                              |                                                 |                                           |                                     | 0.18                 |
| ≤30 hours                                                | 3 126 (22.65)                                | 1 610 (23.17)                                   | 1 516 (22.12)                             | 1.05 (0.94, 1.16)                   |                      |
| >30 hours                                                | 4 672 (22.46)                                | 2 354 (22.79)                                   | 2 318 (22.14)                             | 1.03 (0.95, 1.12)                   |                      |
| Vitamin D supplement use <sup>c</sup>                    |                                              |                                                 |                                           |                                     | 0.002                |
| No                                                       | 5 958 (22.18)                                | 3 026 (22.47)                                   | 2 932 (21.88)                             | 1.03 (0.95, 1.11)                   |                      |
| Yes                                                      | 1 840 (23.79)                                | 938 (24.61)                                     | 902 (23.00)                               | 1.07 (0.94, 1.22)                   |                      |

**sTable 5.** Ad-hoc subgroup analyses; Relative Risk and 99.9% CI for the third and fourth co-primary endpoints (acute respiratory infections), according to randomised assignment to cod liver oil or placebo.

| <b>Co-primary endpoint, acute respiratory infections continued</b> | <b>Overall<br/>(n = 34 601)</b>              | <b>Cod liver oil<br/>group<br/>(n = 17 278)</b> | <b>Placebo<br/>group<br/>(n = 17 323)</b> | <b>Relative Risk<br/>(99.9% CI)</b> | <b>p<sup>a</sup></b> |
|--------------------------------------------------------------------|----------------------------------------------|-------------------------------------------------|-------------------------------------------|-------------------------------------|----------------------|
|                                                                    | <i>number (%) of participants with event</i> |                                                 |                                           |                                     |                      |
| Fourth: Acute respiratory infections                               |                                              |                                                 |                                           |                                     |                      |
| Fatty fish consumer <sup>d</sup>                                   |                                              |                                                 |                                           |                                     | <0.001 <sup>s</sup>  |
| No                                                                 | 3 075 (24.19)                                | 1 539 (24.12)                                   | 1 536 (24.25)                             | 0.99 (0.90, 1.10)                   |                      |
| Yes                                                                | 4 689 (22.03)                                | 2 405 (22.69)                                   | 2 284 (21.38)                             | 1.06 (0.97, 1.16)                   |                      |
| Vaccinated study period <sup>e</sup>                               |                                              |                                                 |                                           |                                     | <0.001 <sup>ss</sup> |
| No                                                                 | 4 880 (21.91)                                | 2 454 (22.22)                                   | 2 426 (21.61)                             | 1.03 (0.95, 1.12)                   |                      |
| Yes                                                                | 2 918 (23.67)                                | 1 510 (24.23)                                   | 1 408 (23.09)                             | 1.05 (0.94, 1.17)                   |                      |
| Strict compliance (yes) <sup>f</sup>                               | 6 824 (29.28)                                | 3 531 (29.61)                                   | 3 293 (28.94)                             | 1.02 (0.96, 1.09)                   | 0.79                 |

Data were missing for 1.7–5.4% of the participants.

<sup>a</sup>The logistic procedure test of the global hypothesis Wald test, significance criterion  $\alpha=0.001$ .

<sup>b</sup>These results are supported by using logistic regression with Age, Body mass index and Sun exposure observed individual values. Treatment type 3 effect p-values are all >0.53, and explanatory effect type 3 p-values are <0.001, <0.001 and 0.37, respectively.

<sup>c</sup>Taking vitamin D supplements (including cod liver oil)  $\geq 5$  days/week was an exclusion criterion, but those with lower frequency of usage were included.

<sup>d</sup>Consuming fatty fish  $\geq 1-2$  days/week and/or  $\geq 1-3$  slices of bread with fatty fish/week.

<sup>e</sup>Reported having  $\geq 1$  SARS-CoV-2 vaccines during the intervention period.

<sup>f</sup>Strict compliance (n=11 959 cod liver oil group, n=11 412 placebo group): reported cod liver oil/placebo consumed >0.5 L or consuming cod liver oil/placebo >2-3 months

<sup>g</sup>These results are supported by using logistic regression with Age, Body mass index and Sun exposure observed individual values. Treatment type 3 effect p-values are all between 0.07 and 0.09, and explanatory effect type 3 p-values are <0.001, 0.04 and 0.66, respectively.

\*The type 3 analysis of effects resulted in p-value for the Sex factor (Women versus Men) of <0.001, p-value for the treatment (cod liver oil/placebo) 0.98.

\*\*The type 3 analysis of effects resulted in p-value for the Age factor (<45 years versus  $\geq 45$  years) of <0.001, p-value for the treatment (cod liver oil/placebo) 0.89.

†The type 3 analysis of effects resulted in p-value for the Body mass index factor (<25 kg/m<sup>2</sup> versus  $\geq 25$  kg/m<sup>2</sup>) of <0.001, p-value for the treatment (cod liver oil/placebo) 1.00.

††The type 3 analysis of effects resulted in p-value for the Fatty fish consumer factor (No versus Yes) of <0.001, p-value for the treatment (cod liver oil/placebo) 0.90.

‡The type 3 analysis of effects resulted in p-value for the Vaccinated study period factor (No versus Yes) of <0.001, p-value for the treatment (cod liver oil/placebo) 0.88.

#The type 3 analysis of effects resulted in p-value for the Strict compliance factor (No versus Yes) of <0.001, p-value for the treatment (cod liver oil/placebo) 0.71.

‡The type 3 analysis of effects resulted in p-value for the Sex factor (Women versus Men) of <0.001, p-value for the treatment (cod liver oil/placebo) 0.07.

‡‡The type 3 analysis of effects resulted in p-value for the Age factor (<45 years versus  $\geq 45$  years) of <0.001, p-value for the treatment (cod liver oil/placebo) 0.06.

<sup>s</sup>The type 3 analysis of effects resulted in p-value for the Fatty fish consumer factor (No versus Yes) of <0.001, p-value for the treatment (cod liver oil/placebo) 0.09.

<sup>ss</sup>The type 3 analysis of effects resulted in p-value for the Vaccinated study period factor (No versus Yes) of <0.001, p-value for the treatment (cod liver oil/placebo) 0.08.

**sTable 6.** Ad-hoc subgroup analyses; the third and fourth co-primary endpoints (acute respiratory infections), according to skin type and assignment to cod liver oil or placebo.

| <b>Co-primary endpoint, acute respiratory infections</b> | <b>Cod liver oil group<br/>(n = 17 278)</b>  |               | <b>Placebo group<br/>(n = 17 323)</b> |               | <b>p<sup>a</sup></b> |
|----------------------------------------------------------|----------------------------------------------|---------------|---------------------------------------|---------------|----------------------|
|                                                          | <i>number (%) of participants with event</i> |               |                                       |               |                      |
| Third: SARS-CoV-2 negative test result                   | No                                           | Yes           | No                                    | Yes           |                      |
| Skin type                                                |                                              |               |                                       |               | <0.001*              |
| Easily burnt, rarely tan                                 | 648 (7.80)                                   | 701 (8.56)    | 613 (7.37)                            | 685 (8.41)    |                      |
| Easily burnt, sometimes tan                              | 918 (11.04)                                  | 1 003 (12.25) | 881 (10.59)                           | 1 004 (12.33) |                      |
| Sometimes burnt, always tan                              | 5 699 (68.56)                                | 5 563 (67.96) | 5 694 (68.46)                         | 5 494 (67.49) |                      |
| Never burnt, always tan                                  | 879 (10.57)                                  | 754 (9.21)    | 945 (11.36)                           | 781 (9.59)    |                      |
| Naturally tan                                            | 169 (2.03)                                   | 165 (2.02)    | 184 (2.21)                            | 177 (2.17)    |                      |
| Fourth: Acute respiratory infections                     | No                                           | Yes           | No                                    | Yes           |                      |
| Skin type                                                |                                              |               |                                       |               | <0.001**             |
| Easily burnt, rarely tan                                 | 987 (7.82)                                   | 362 (9.34)    | 982 (7.73)                            | 316 (8.43)    |                      |
| Easily burnt, sometimes tan                              | 1 417 (11.23)                                | 504 (13.00)   | 1 385 (10.90)                         | 500 (13.34)   |                      |
| Sometimes burnt, always tan                              | 8 633 (68.39)                                | 2 629 (67.83) | 8 651 (68.07)                         | 2 537 (67.67) |                      |
| Never burnt, always tan                                  | 1 300 (10.30)                                | 333 (8.59)    | 1 382 (10.87)                         | 344 (9.18)    |                      |
| Naturally tan                                            | 286 (2.27)                                   | 48 (1.24)     | 309 (2.43)                            | 52 (1.39)     |                      |

<sup>a</sup>The logistic procedure test of the global hypothesis Wald test, significance criterion  $\alpha=0.001$ .

\*The joint tests analysis of effects resulted in p-value for the Skin type factor <0.001, the p-value for the treatment (cod liver oil/placebo) 0.47.

\*\*The joint tests analysis of effects resulted in p-value for the Skin type factor <0.001, the p-value for the treatment (cod liver oil/placebo) 0.31.



**sTable 7.** Logistic regression with explanatory variables, positive SARS-CoV-2 test result

| Summary of Stepwise Selection |                 |         |    |           |                  |                 |            |                                     |
|-------------------------------|-----------------|---------|----|-----------|------------------|-----------------|------------|-------------------------------------|
| Step                          | Effect          |         | DF | Number In | Score Chi-Square | Wald Chi-Square | Pr > ChiSq | Variable Label                      |
|                               | Entered         | Removed |    |           |                  |                 |            |                                     |
| 1                             | Cov19_VaccineYN |         | 1  | 1         | 48.2679          |                 | <0.001     | Covid-19 vaccinated (No versus Yes) |
| 2                             | gen_age_above45 |         | 1  | 2         | 5.8448           |                 | 0.02       | Age (<45 years versus ≥45 years)    |

**sTable 8.** Logistic regression with explanatory variables, serious covid-19

| Summary of Stepwise Selection |                      |         |    |           |                  |                 |            |                                                                       |
|-------------------------------|----------------------|---------|----|-----------|------------------|-----------------|------------|-----------------------------------------------------------------------|
| Step                          | Effect               |         | DF | Number In | Score Chi-Square | Wald Chi-Square | Pr > ChiSq | Variable Label                                                        |
|                               | Entered              | Removed |    |           |                  |                 |            |                                                                       |
| 1                             | Cov19_VaccineYN      |         | 1  | 1         | 26.4426          |                 | <0.001     | Covid-19 vaccinated (No versus Yes)                                   |
| 2                             | BMI_Above25          |         | 1  | 2         | 4.4747           |                 | 0.03       | Body mass index (≤25 kg/m <sup>2</sup> versus >25 kg/m <sup>2</sup> ) |
| 3                             | deriv_F3_FatFish_con |         | 1  | 3         | 3.1783           |                 | 0.07       | Fatty fish consumer (No versus Yes)                                   |
| 4                             | gen_CLOC_compliance_ |         | 1  | 4         | 2.1361           |                 | 0.14       | Strict compliance (Yes)                                               |
| 5                             | Treatment            |         | 1  | 5         | 1.5609           |                 | 0.21       | Cod liver oil versus Placebo                                          |
| 6                             | deriv_F3_VitaminD_us |         | 1  | 6         | 1.2593           |                 | 0.26       | Vitamin D supplement use (No versus Yes)                              |

**Figure 1** Positive SARS-CoV-2 test result over the intervention period

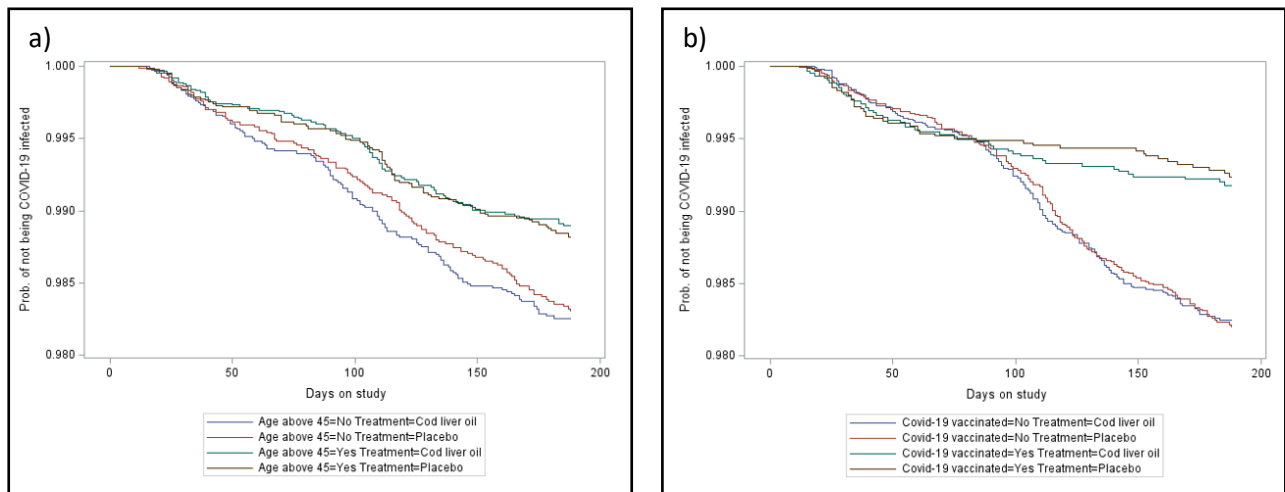

The Kaplan-Meier curve demonstrates the probability of a SARS-CoV-2 positive test result stratified by a) Age (<45 years versus  $\geq 45$ ), and b) Vaccinated study period (No versus Yes) for the cod liver oil and the placebo groups over the intervention period ( $p < 0.05$ ).

**Figure 2** Serious Covid-19 over the intervention period

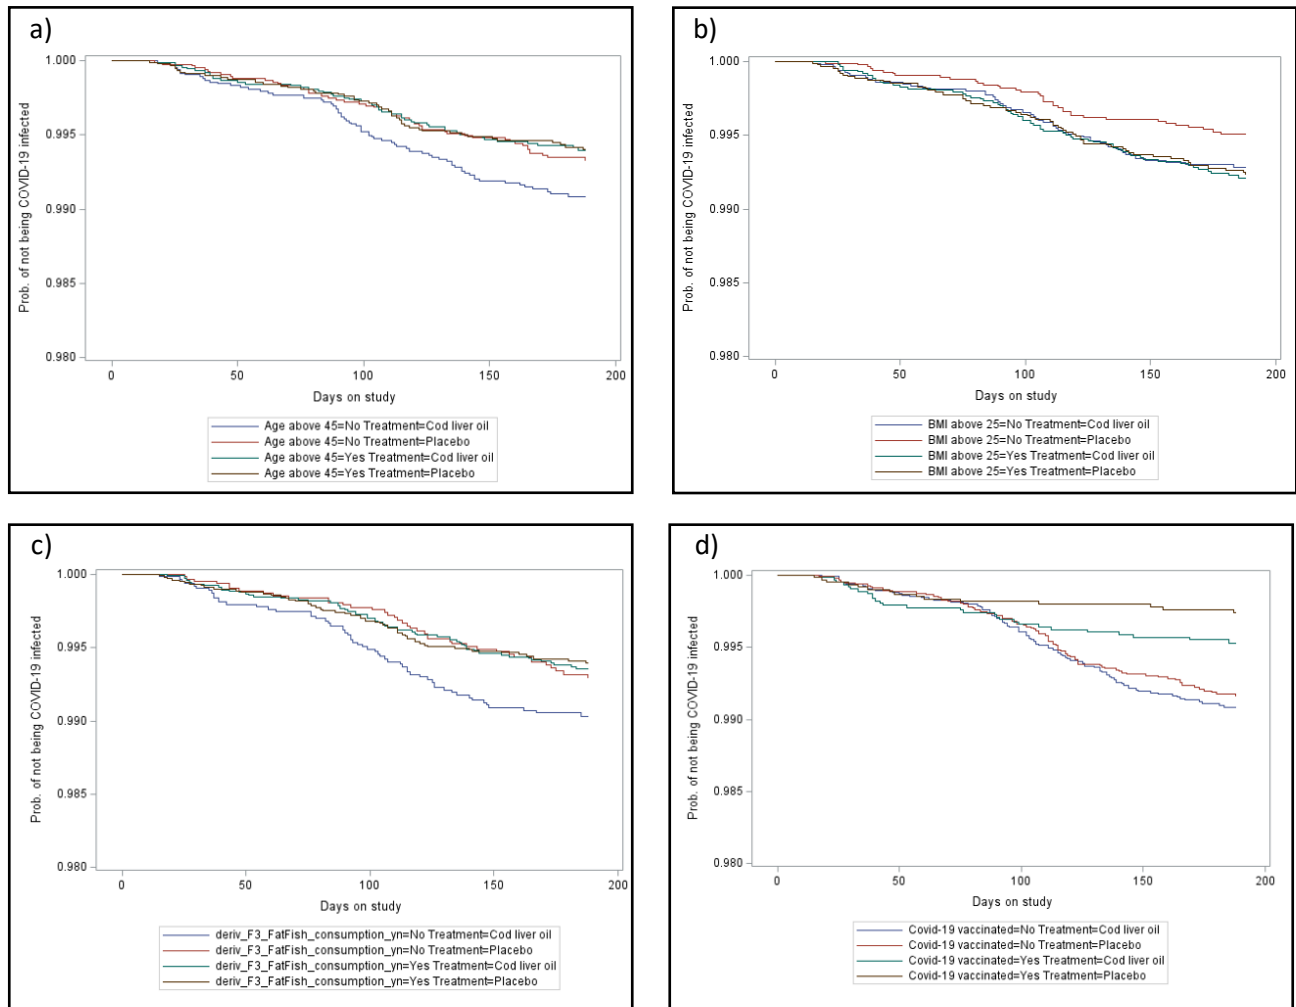

The Kaplan-Meier curve demonstrates the probability of serious covid-19 stratified by a) Age (<45 years versus ≥45), b) Body mass index (BMI, ≤25 kg/m<sup>2</sup> versus >25 kg/m<sup>2</sup>), c) Fatty fish consumer (No versus Yes), and d) Vaccinated study period (No versus Yes) for the cod liver oil and the placebo groups over the intervention period (p<0.05).
